# Supplementary material
Source: MDPI journal article supplement (https://www.mdpi.com/2073-4441/12/10/2852)
Supplement: s1 [file s1]

## Supplementary Materials of A Novel Method for Determination of the Natural Toxin Ptaquiloside in Ground and Drinking Water

*Water chemistry data for raw groundwater and treated water from study site Vigersted*

**Table S1.** Water chemistry data for raw groundwater and treated water (Vigersted) sampled in January 2019. Source: HOFOR (Denmark).

| Parameter                          | Vigersted<br>(raw water) | Vigersted<br>(treated water) | Unit                 |
|------------------------------------|--------------------------|------------------------------|----------------------|
| Total alkalinity                   | 6.5                      | 6.0                          | mmol L <sup>-1</sup> |
| Hardness (total)                   | 19.3                     | 20.2                         | ° dH                 |
| Sodium                             | 60                       | 66                           | mg L <sup>-1</sup>   |
| Magnesium                          | 17                       | 21                           | mg L <sup>-1</sup>   |
| Calcium                            | 110                      | 110                          | mg L <sup>-1</sup>   |
| Manganese                          | 0.073                    | 0.001                        | mg L <sup>-1</sup>   |
| Iron                               | 1.7                      | 0.01                         | mg L <sup>-1</sup>   |
| Zinc                               | 1.1                      | 0.59                         | µg L <sup>-1</sup>   |
| Chromium                           | 0.056                    | 0.010                        | µg L <sup>-1</sup>   |
| Cadmium                            | 0.0030                   | 0.0072                       | µg L <sup>-1</sup>   |
| Nickel                             | 0.52                     | 0.030                        | µg L <sup>-1</sup>   |
| Cobalt                             | 0.030                    | 0.017                        | µg L <sup>-1</sup>   |
| Arsenic                            | 0.13                     | 0.14                         | µg L <sup>-1</sup>   |
| Potassium                          | 5.8                      | 5.4                          | mg L <sup>-1</sup>   |
| Oxygen                             | 0.04                     | 10.7                         | mg L <sup>-1</sup>   |
| Selenium                           | 0.050                    | 0.10                         | µg L <sup>-1</sup>   |
| Phosphorus (total)                 | 0.036                    | 0.003                        | mg L <sup>-1</sup>   |
| Chloride                           | 94                       | 110                          | mg L <sup>-1</sup>   |
| Carbonate                          | 2                        | 2                            | mg L <sup>-1</sup>   |
| Bicarbonate                        | 400                      | 370                          | mg L <sup>-1</sup>   |
| Hydrogen sulfide                   | 0.02                     | 0.02                         | mg L <sup>-1</sup>   |
| Sulphate                           | 52                       | 60                           | mg L <sup>-1</sup>   |
| Methane at 10 ° C                  | 0.045                    | 0.010                        | mg L <sup>-1</sup>   |
| Ammonia + ammonium                 | 0.85                     | 0.004                        | mg L <sup>-1</sup>   |
| Nitrate                            | 0.10                     | 1.5                          | mg L <sup>-1</sup>   |
| Nitrite                            | 0.0010                   | 0.0020                       | mg L <sup>-1</sup>   |
| NVOC (non-volatile organic carbon) | 3.2                      | 2.6                          | mg L <sup>-1</sup>   |

# Map of the study site (Vigersted) and Humleore forest

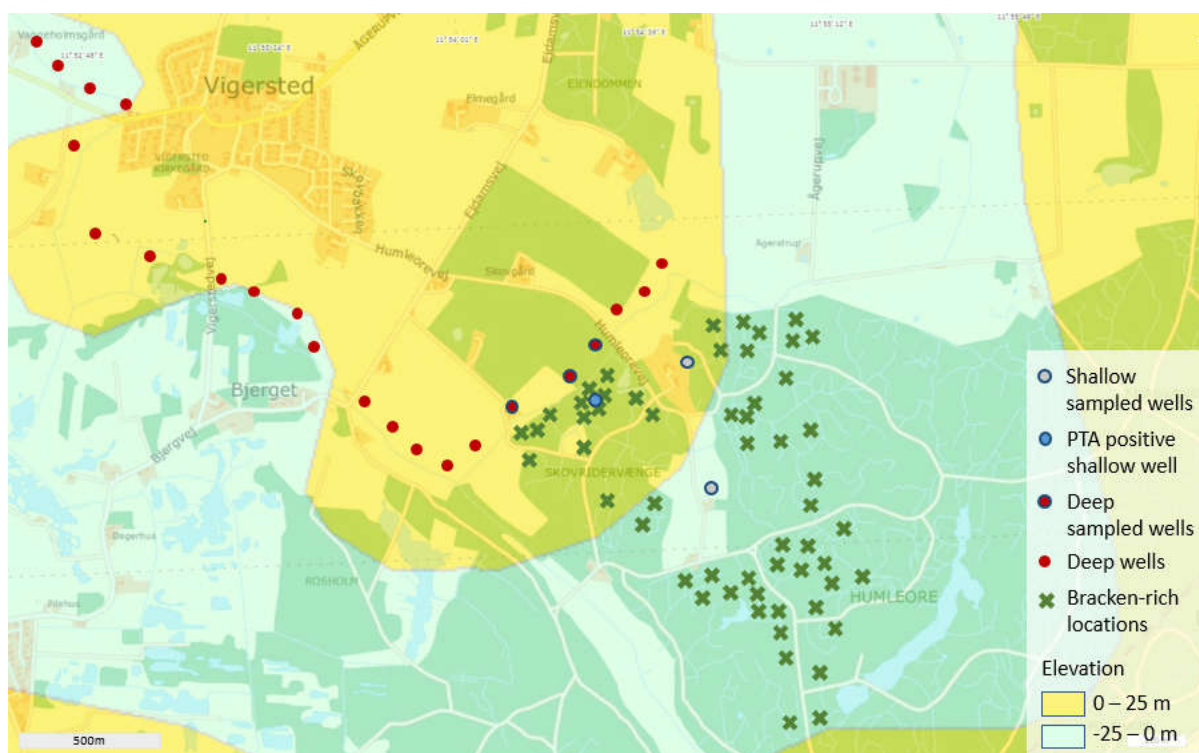

**Figure S1.** Vigersted water wells field site, water wells included in the monitoring and bracken-rich area in Humleore forest. Source: GEUS database, Denmark [47].

## Development of the PTA preservation method by applying Plackett-Burman experimental design

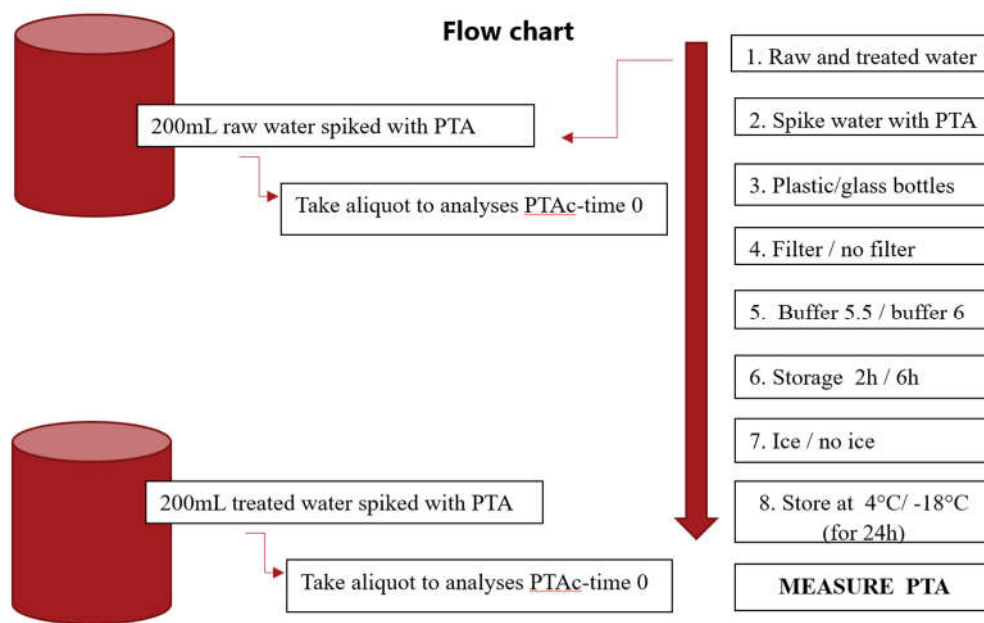

**Figure S2.** Flow chart for developing the preservation method of PTA in groundwater samples.

*Validation of the analytical method (LC-MS) - Linearity of calibration curves over investigated concentration ranges*

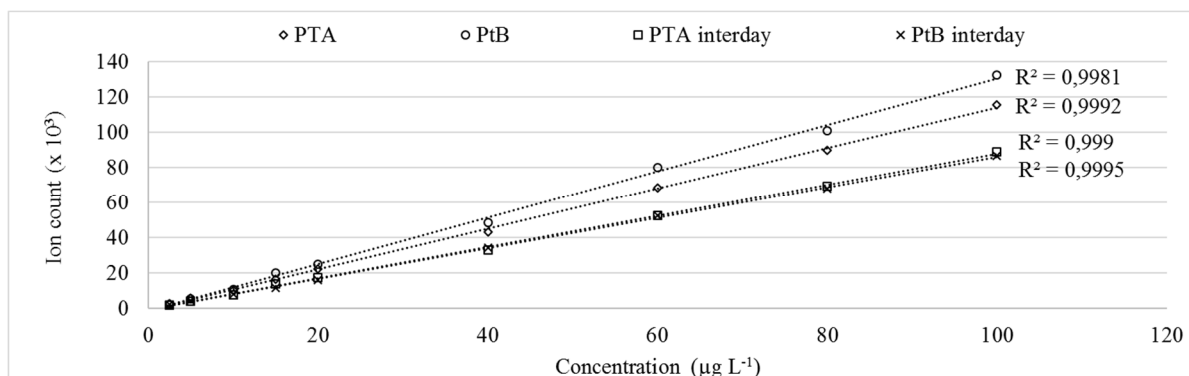

**Figure S3.** Calibration curves of the standard solutions of analytes.

Calibration curves in Figure S3 are produced for validation of LC-MS method described in Rai et al. [43]. Each calibration curve was made from 10 data points. Intraday measurements of both PTA and PtB were taken.
